# Supplementary material for: Nanocasting synthesis of an ordered mesoporous CeO2-supported Pt nanocatalyst with enhanced catalytic performance for the reduction of 4-nitrophenol
Source: Royal Society of Chemistry journal article supplement (doi:10.1039/c5ra23472g), 2015-12-17
Supplement: c5ra23472g1.pdf [file c5ra23472g1.pdf]

# Supplementary Information for

## Nanocasting synthesis of ordered mesoporous CeO<sub>2</sub>-supported Pt nanocatalyst with enhanced catalytic performance for the reduction of 4-nitrophenol

Qianli Wang, Yiwei Zhang,\* Yuming Zhou,\* Zewu Zhang, Jinjuan Xue, Yuanmei Xu, Chao Zhang, Xiaoli Sheng and Naishu Kui

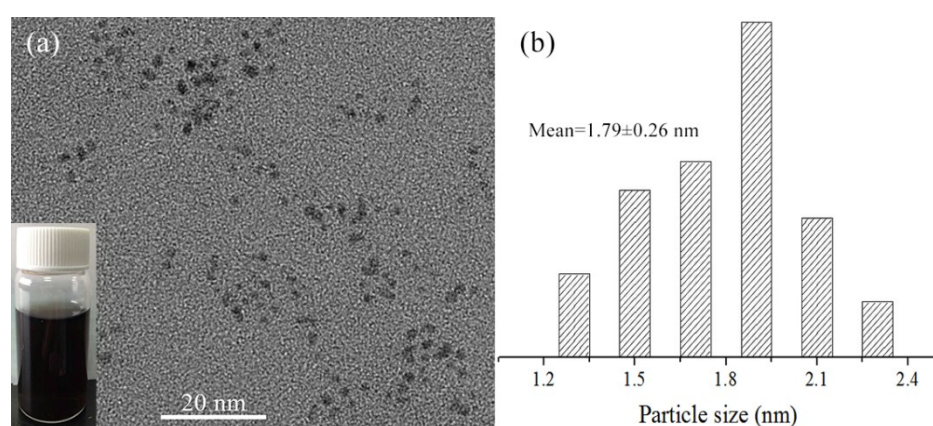

**Fig. S1** (a) TEM image (inset is the corresponding solution) and (b) corresponding size distribution histogram for Pt NPs stabilized by PAMAM dendrimers.

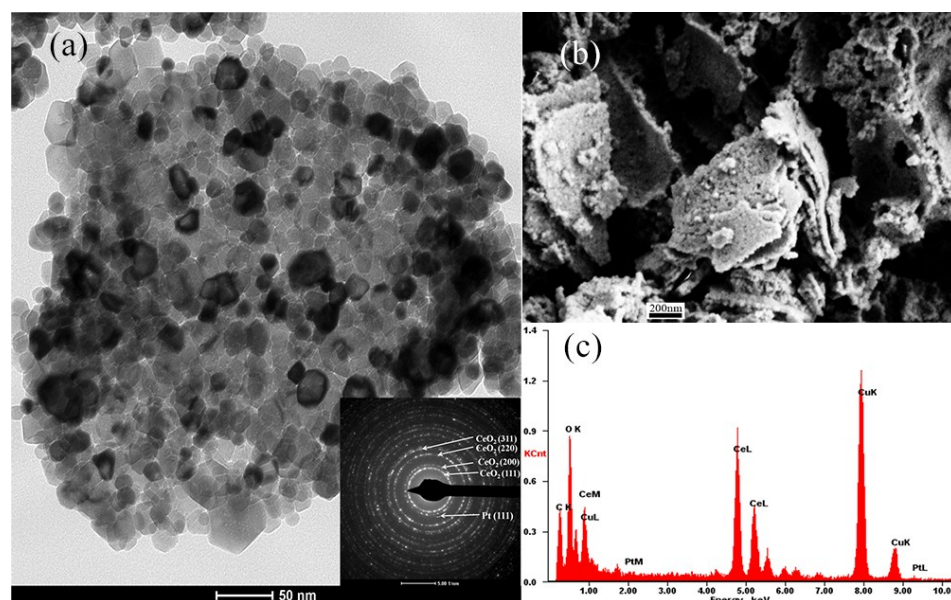

**Fig. S2** (a) TEM image of Pt/nano-CeO<sub>2</sub> (inset is the SAED pattern); (b) SEM image of Pt/nano-CeO<sub>2</sub>; (c) EDX analysis of Pt/nano-CeO<sub>2</sub>.

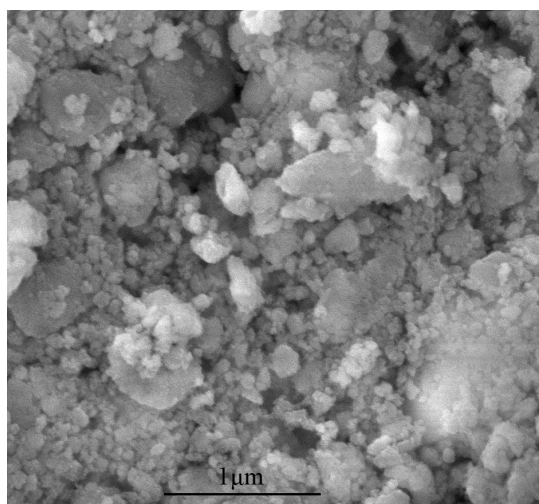

**Fig. S3** SEM image of KIT-6
